# Supplementary material for: Development of the Method for Nusinersen and Its Metabolites Identification in the Serum Samples of Children Treated with Spinraza for Spinal Muscular Atrophy
Source: Int J Mol Sci. 2022 Sep 5;23(17):10166. doi: 10.3390/ijms231710166 (PMC9456300; doi:10.3390/ijms231710166)
Supplement: Supplementary file 1 [file ijms-23-10166-s001.zip › ijms-1860396-supplementary.pdf]

# **Development of the method for nusinersen and its metabolites identification in the serum samples of children treated with Spinraza for spinal muscular atrophy**

Sylvia Studzińska<sup>a,\*</sup>, Maria Mazurkiewicz-Będzińska<sup>b</sup>, Bogusław Buszewski<sup>a</sup>

<sup>a</sup> Chair of Environmental Chemistry and Bioanalytics, Faculty of Chemistry, Nicolaus Copernicus University in Toruń, 7 Gagarin Str., PL-87-100 Toruń (Poland),  
tel. (48)(56)6114308, fax. (48)(56)6114837,

<sup>b</sup> Department of Developmental Neurology, Medical University of Gdansk, 7 Dębinki Str.,  
PL-80-952, Gdańsk, Poland

\*[kowalska@chem.umk.pl](mailto:kowalska@chem.umk.pl)

The polymerizable ILs with a vinyl functional group was used together with the Fe<sub>3</sub>O<sub>4</sub> particles. Their surface was firstly modified with 3-(methacryloxy)propyltrimethoxysilane (MPS). Next, Fe<sub>3</sub>O<sub>4</sub>-MPS were coated with poly(ionic liquid) crosslinked with divinylbenzene. The coating was performed by miniemulsion polymerization of the synthesized ILs in the presence of DVB as a cross-linker and K<sub>2</sub>S<sub>2</sub>O<sub>8</sub> as an initiator. Coating of MNPs with zwitterionic, crosslinked poly(ionic liquid)s was performed in two steps: 1. the coating of Fe<sub>3</sub>O<sub>4</sub> with the polymer with protected carboxyl groups (in form of ethyl ester); 2. deprotection by the basic hydrolysis [20]. The structure of MNPs used in the study is presented below.

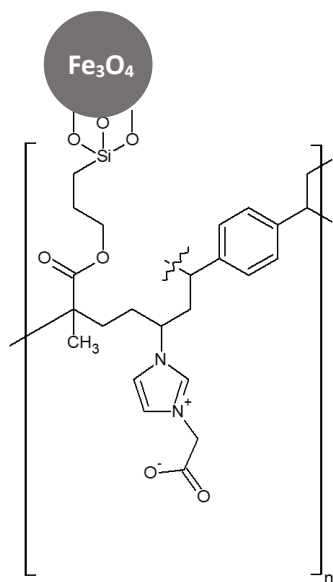

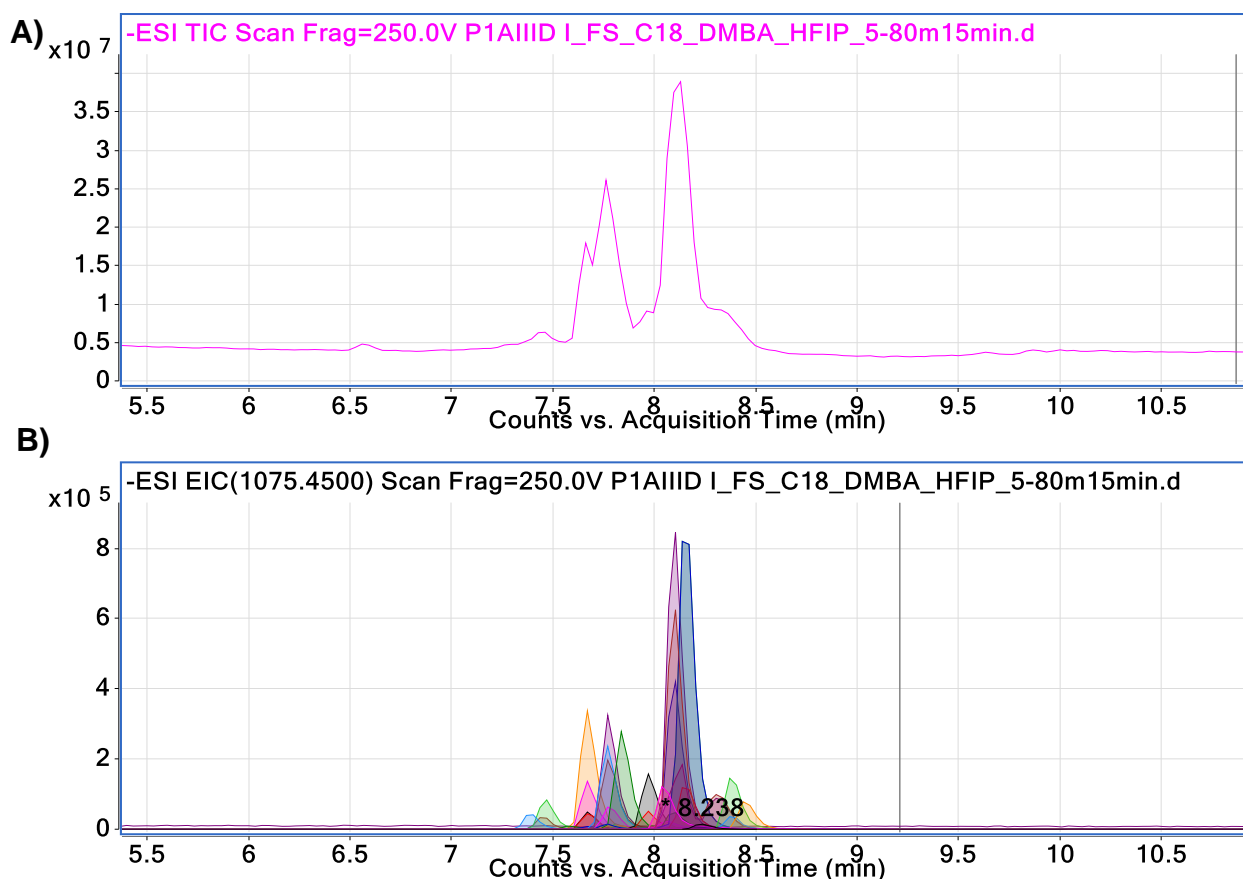

Figure S1. Exemplary separation results of metabolites in the extract obtained from one of the patients after administration of the third nusinersen dose: A) TIC, B) EIC. Experimental conditions: Kinetex 1.7 $\mu$ m EVO C18 column; mobile phase composition 150mM HFIP/5mM DMBA, MeOH; gradient elution: 5-80% MeOH in 15 minutes; flow rate 0.3 ml/min; autosampler temperature 30 °C, column temperature 50 °C; injection volume 2.5  $\mu$ L; mass spectrometric conditions: nebulizer gas pressure 20psi, skimmer voltage 100V, capillary voltage 4000V, fragmentor voltage 250V; drying gas flow 10 l/min; shielding gas flow 10 l/min; octopole voltage 800V; drying gas temperature 350°C; shielding gas temperature 400 °C.

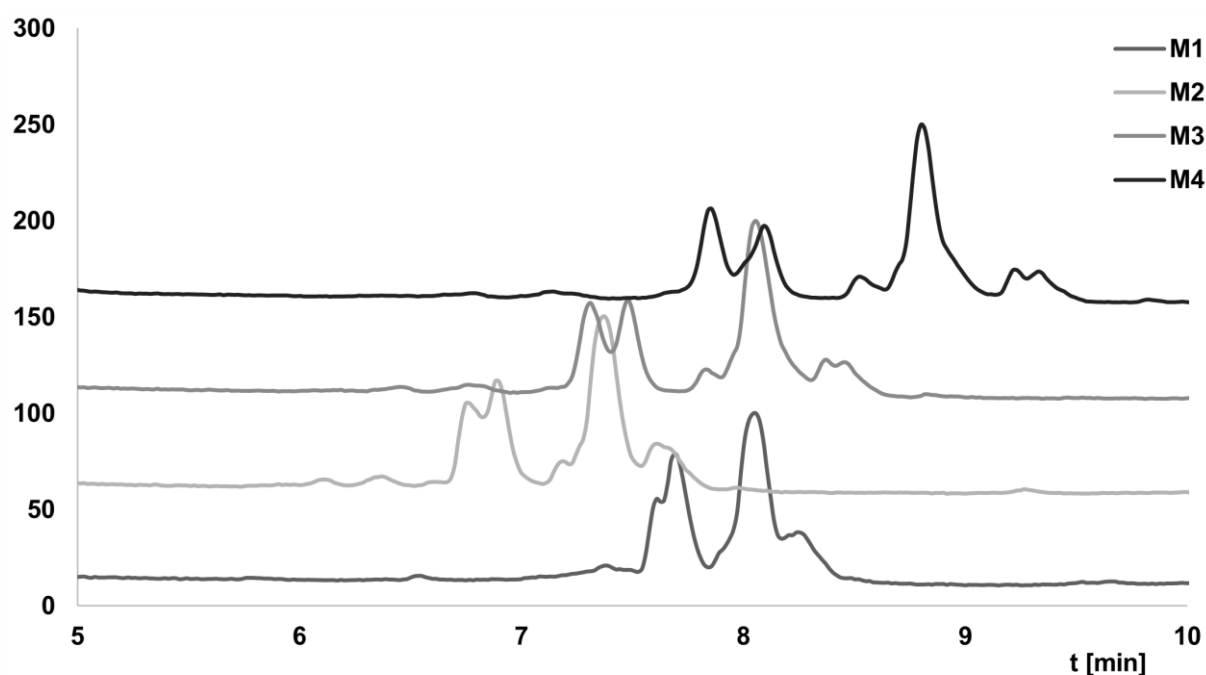

Figure S2. Exemplary TIC separation results of metabolites in the extract obtained from one of the patients after administration of the third nusinersen dose. Notation: M1 – gradient elution: 5-80% MeOH in 15 minutes; M2 – gradient elution: 10-70% MeOH in 15 minutes; M3 – gradient elution: 10-55% MeOH in 15 minutes; M4 – gradient elution: 10-45% MeOH in 15 minutes. Experimental conditions: Kinetex 1.7 $\mu$ m EVO C18 column; mobile phase composition 150mM HFIP/5mM DMBA, MeOH; autosampler temperature 30 °C, column temperature 50 °C; injection volume 2.5  $\mu$ L; mass spectrometric conditions: nebulizer gas pressure 20 psi, skimmer voltage 60 V, capillary voltage 4000V, fragmentor voltage 250V; drying gas flow 10 l/min; shielding gas flow 10 l/min; octopole voltage 800V; drying gas temperature 350°C; shielding gas temperature 400 °C.

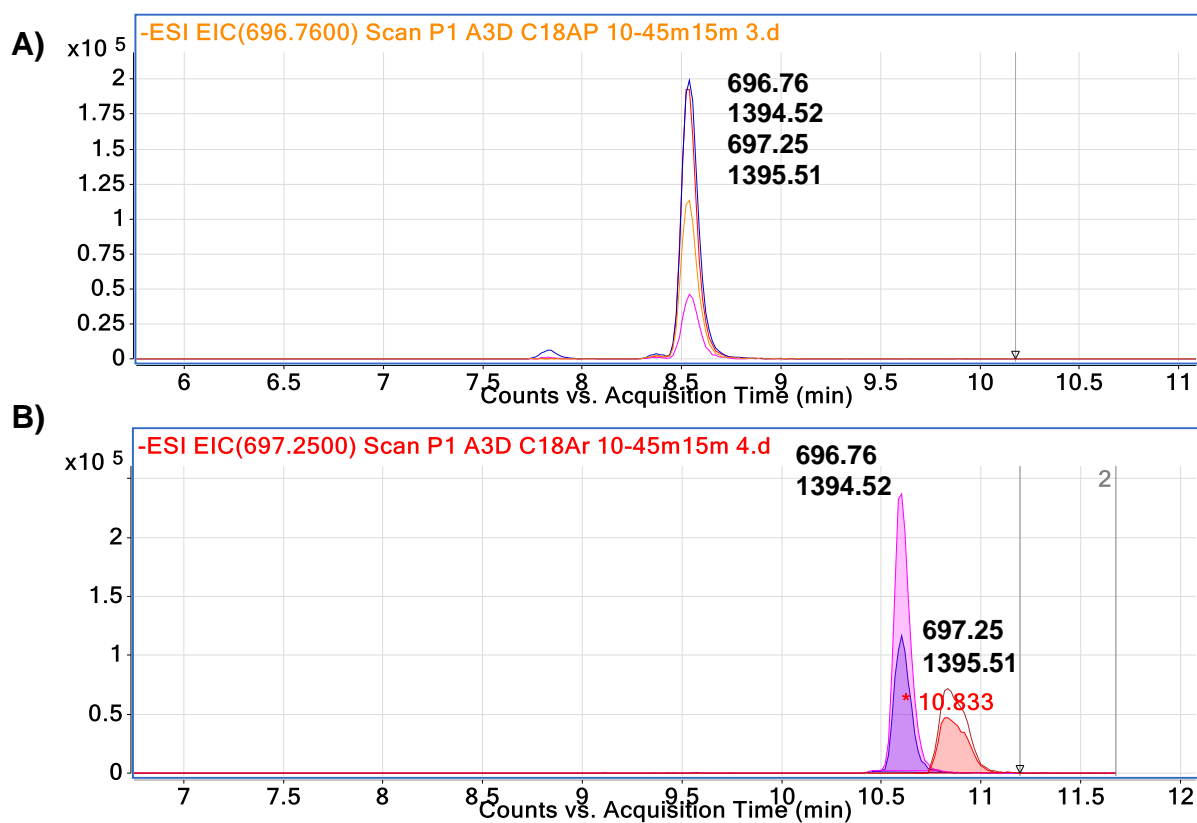

Figure S3. Exemplary EIC chromatograms for two pairs of ions:  $m/z=696.76$  Da,  $m/z=1394.52$  Da and  $m/z=697.25$  Da and  $m/z=1395.51$  Da: A) for C18AP, B) for C18Ar. Experimental conditions: mobile phase composition 150mM HFIP/5mM DMBA, MeOH; gradient elution: 10-45% MeOH in 15 minutes; flow rate 0.3 ml/min; autosampler temperature 30 °C, column temperature 50 °C; injection volume 2.5  $\mu$ L; mass spectrometric conditions: nebulizer gas pressure 20psi, skimmer voltage 100V, capillary voltage 4000V, fragmentor voltage 250V; drying gas flow 10 l/min; shielding gas flow 10 l/min; octopole voltage 800V; drying gas temperature 350°C; shielding gas temperature 400 °C.

Table S1. Peak areas at extracted ion chromatogram (EIC) obtained for different mass spectrometry parameters and selected ions.

| Ion     | EIC peak areas         |        |        |        |                     |         |         |                       |         |         |                              |         |        |
|---------|------------------------|--------|--------|--------|---------------------|---------|---------|-----------------------|---------|---------|------------------------------|---------|--------|
|         | Fragmentor voltage [V] |        |        |        | Skimmer voltage [V] |         |         | Capillary voltage [V] |         |         | Nebulizer gas pressure [psi] |         |        |
|         | 100                    | 150    | 200    | 250    | 40                  | 80      | 100     | 3000                  | 3500    | 4000    | 20                           | 40      | 60     |
| 731.31  | 76739                  | 157068 | 515128 | 553768 | 594174              | 774308  | 788074  | 527612                | 608221  | 772300  | 782322                       | 701877  | 670253 |
| 1204.55 | 43474                  | 78252  | 275568 | 502615 | 325322              | 489927  | 501585  | 309899                | 426569  | 522874  | 501093                       | 430053  | 363381 |
| 1307.54 | 56842                  | 111888 | 365367 | 685361 | 444849              | 651908  | 688937  | 447256                | 536446  | 691033  | 684822                       | 519356  | 445969 |
| 1323.51 | 23266                  | 59387  | 159694 | 305853 | 199426              | 254221  | 308209  | 129640                | 238788  | 310532  | 319641                       | 252778  | 206755 |
| 1236.48 | 155347                 | 278248 | 791835 | 962254 | 1039227             | 1540617 | 1606259 | 998477                | 1401892 | 1580322 | 1600315                      | 1302181 | 972231 |
| 1394.55 | 26839                  | 279890 | 766193 | 957919 | 1015236             | 1495885 | 1523436 | 1069897               | 1390238 | 1582009 | 1618314                      | 1286743 | 987006 |
